# Supplementary material for: Serum BDNF Levels in Relation to Illness Severity, Suicide Attempts, and Central Serotonin Activity in Patients with Major Depressive Disorder: A Pilot Study
Source: PubMed Central journal article supplement (PMC3963843; doi:10.1371/journal.pone.0091061), 2014-03-24

*Spearman: r=0.59, p=0.016*

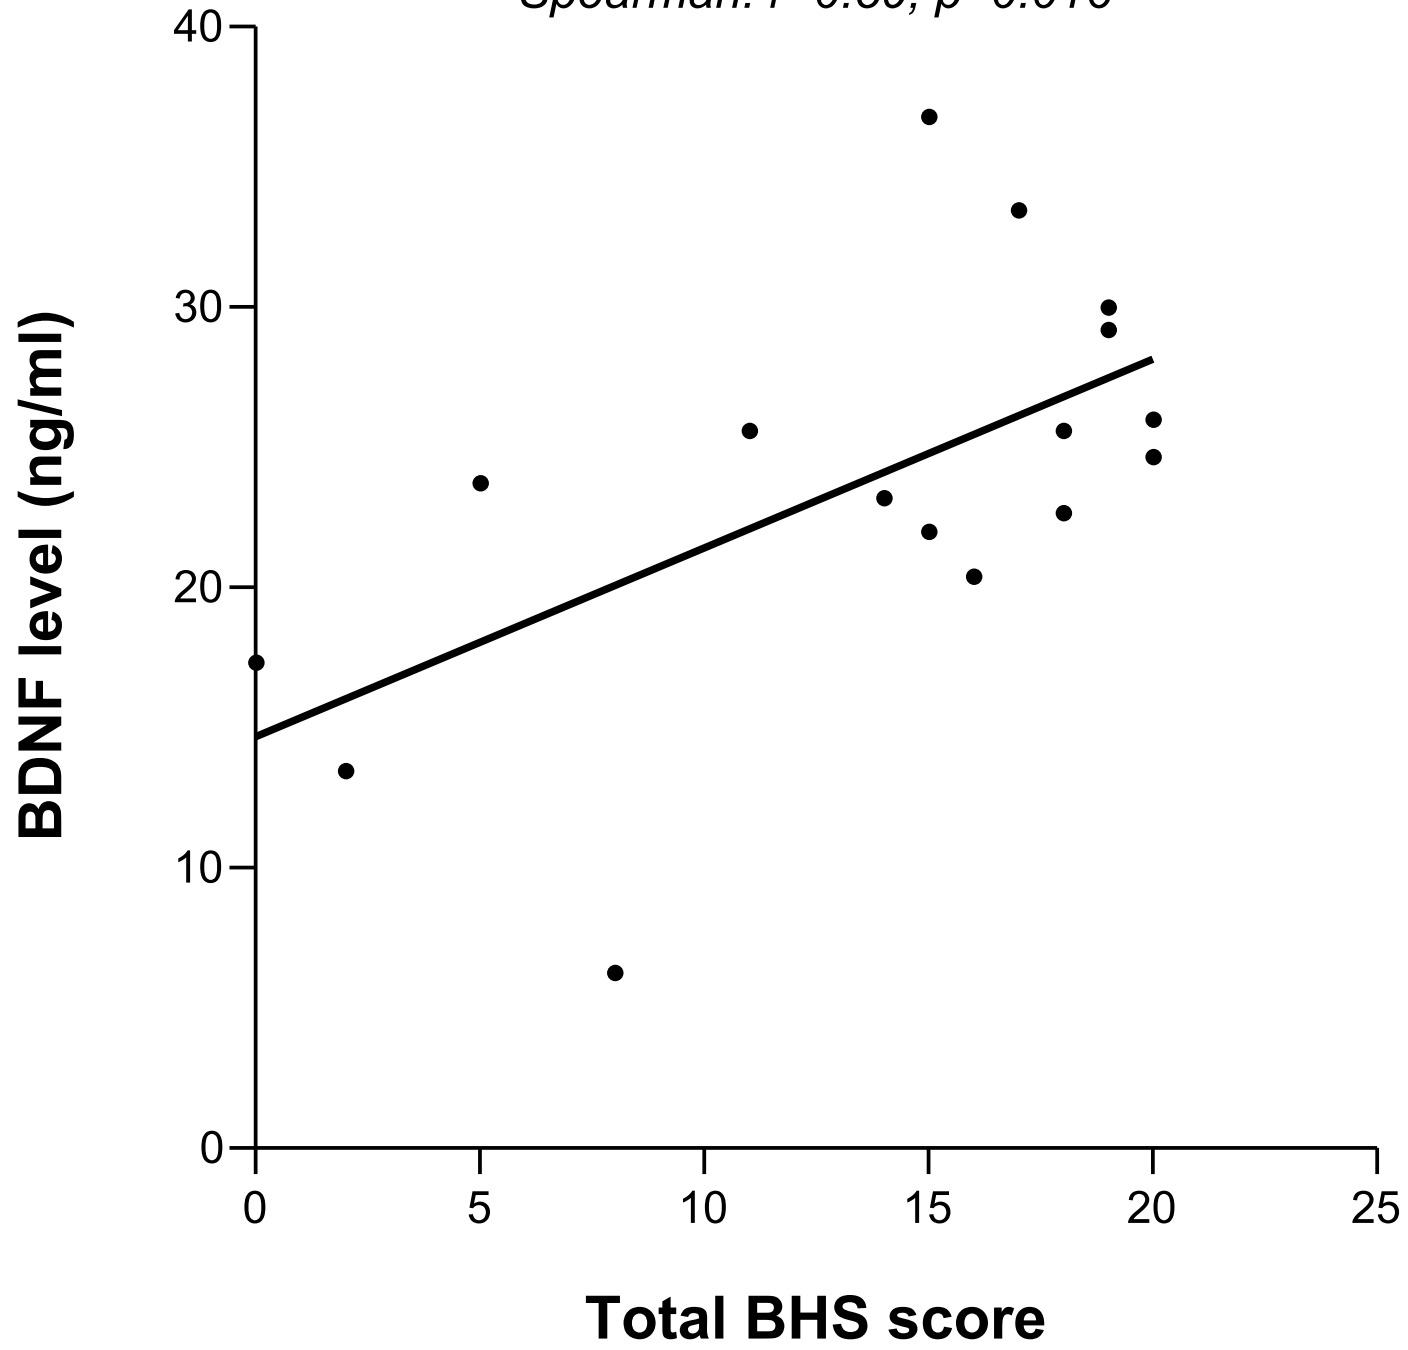

Supplement: pone.0091061.s002.pdf [file pone.0091061.s002.pdf]
